# Supplementary material for: Embryonic Stem Cell (ES)-Specific Enhancers Specify the Expression Potential of ES Genes in Cancer
Source: PubMed Central journal article supplement (PMC4757527; doi:10.1371/journal.pgen.1005840), 2016-02-17
Supplement: pgen.1005840.s002.pdf [file pgen.1005840.s002.pdf]

**S1 Table.** Chromatin, DNA methylation and gene expression datasets used in the study.

| Sample                      | H3K4me1 |         | H3K4me3 |         | H3K27me3 |         | DNA methylation |            | Gene expression |          |
|-----------------------------|---------|---------|---------|---------|----------|---------|-----------------|------------|-----------------|----------|
|                             | #       | Source  | #       | Source  | #        | Source  | #               | Source     | #               | Source   |
| ES                          | 6       | Roadmap | 9       | Roadmap | 6        | Roadmap | 3               | GSE40909   | 3               | GSE7332  |
| HSC (CD34 <sup>+</sup> )    | 7       | Roadmap | 6       | Roadmap | 8        | Roadmap | 1               | GSM1032771 | 2               | GSE10325 |
| T-cell (CD4 <sup>+</sup> )  | 6       | Roadmap | 7       | Roadmap | 6        | Roadmap | 6               | GSE35069   | 9               | GSE10325 |
| T-cell (CD8 <sup>+</sup> )  | 5       | Roadmap | 5       | Roadmap | 5        | Roadmap | 6               | GSE35069   |                 |          |
| B-cell (CD19 <sup>+</sup> ) | 1       | Roadmap | 2       | Roadmap | 1        | Roadmap | 6               | GSE35069   | 9               | GSE10325 |
| Jurkat                      |         |         |         |         |          |         | 1               | ENCODE     | 1               | ENCODE   |
| K562                        |         |         |         |         |          |         | 1               | ENCODE     | 1               | ENCODE   |
| DLBCL                       |         |         |         |         |          |         | 28              | TCGA       | 28              | TCGA     |
| CRC                         |         |         |         |         |          |         | 290             | TCGA       | 290             | TCGA     |
| HCC                         |         |         |         |         |          |         | 207             | TCGA       | 207             | TCGA     |

**Abbreviations:** **ES:** Embryonic Stem Cells; **HSC:** Hematopoietic Stem Cells; **DLBCL:** Diffuse Large B-Cell Lymphoma; **CRC:** Colorectal Cancer; **HCC:** Hepatocellular Carcinoma; **Roadmap:** Roadmap Epigenomics Project; **GSE#:** Accession number in the Gene Expression Omnibus (GEO); **ENCODE:** Encyclopedia of DNA Elements.
