# Supplementary material for: Embryonic Stem Cell (ES)-Specific Enhancers Specify the Expression Potential of ES Genes in Cancer
Source: PubMed Central journal article supplement (PMC4757527; doi:10.1371/journal.pgen.1005840), 2016-02-17
Supplement: pgen.1005840.s003.pdf [file pgen.1005840.s003.pdf]

**S2 Table.** Methylation fate in Jurkat T-cell leukemia of sites that are highly methylated in normal T-cells.

| <b>Non-promoter sites that are methylated (&gt;70%) in T-cells</b> |          | <b>Hypomethylation in T-cell leukemia</b> |                                |                             |                                         |
|--------------------------------------------------------------------|----------|-------------------------------------------|--------------------------------|-----------------------------|-----------------------------------------|
| <b>Class</b>                                                       | <b>#</b> | <b>Fraction of class (%)</b>              | <b>Fold-ratio (versus all)</b> | <b>P-value (versus all)</b> | <b>Average cancer-normal difference</b> |
| All                                                                | 130,794  | 18.2                                      |                                |                             | -10.2%                                  |
| ESSEs                                                              | 35,392   | 22.6                                      | 1.24                           | <1e-20                      | -12.3%                                  |
| ESSEs unmethylated in ES                                           | 3,451    | 26.5                                      | 1.46                           | <1e-20                      | -12.5%                                  |
| Non-ESSE sites unmethylated in ES                                  | 2,825    | 19.0                                      | 1.04                           | 0.14                        | -8.1%                                   |
| Constitutive enhancers unmethylated in ES                          | 1,266    | 13.1                                      | 0.72                           | 1.9e-3                      | -4.1%                                   |
