# Supplementary material for: Embryonic Stem Cell (ES)-Specific Enhancers Specify the Expression Potential of ES Genes in Cancer
Source: PubMed Central journal article supplement (PMC4757527; doi:10.1371/journal.pgen.1005840), 2016-02-17
Supplement: pgen.1005840.s004.pdf [file pgen.1005840.s004.pdf]

**S3 Table.** Enriched groups of genes adjacent to cancer-hypomethylated ESSEs.

| Common pathway                                                             | Rank | P-val. | FDR Q-val. | Fold Enrich. | Foreground hits | Background hits | FgSetTermCo v | Foreground genes | Total Genes |
|----------------------------------------------------------------------------|------|--------|------------|--------------|-----------------|-----------------|---------------|------------------|-------------|
| Syndecan-4-mediated signaling events                                       | 1    | 3.E-08 | 4.E-05     | 1.61         | 129             | 714             | 0.03          | 64               | 209         |
| VEGF and VEGFR signaling network                                           | 2    | 7.E-08 | 6.E-05     | 1.26         | 456             | 3239            | 0.11          | 258              | 1304        |
| Signaling events mediated by VEGFR1 and VEGFR2                             | 3    | 9.E-08 | 5.E-05     | 1.26         | 447             | 3172            | 0.11          | 255              | 1296        |
| Wnt signaling network                                                      | 4    | 3.E-07 | 1.E-04     | 1.58         | 122             | 692             | 0.03          | 58               | 200         |
| Proteoglycan syndecan-mediated signaling events                            | 5    | 3.E-07 | 9.E-05     | 1.24         | 458             | 3293            | 0.11          | 265              | 1345        |
| Wnt                                                                        | 6    | 5.E-07 | 1.E-04     | 1.79         | 74              | 369             | 0.02          | 30               | 82          |
| Noncanonical Wnt signaling pathway                                         | 7    | 7.E-07 | 2.E-04     | 1.59         | 108             | 606             | 0.03          | 51               | 182         |
| IL5-mediated signaling events                                              | 8    | 8.E-07 | 2.E-04     | 1.24         | 436             | 3146            | 0.11          | 251              | 1292        |
| PAR1-mediated thrombin signaling events                                    | 9    | 9.E-07 | 2.E-04     | 1.24         | 435             | 3141            | 0.10          | 252              | 1299        |
| Thrombin/protease-activated receptor (PAR) pathway                         | 10   | 9.E-07 | 1.E-04     | 1.24         | 435             | 3142            | 0.10          | 252              | 1300        |
| Glypican pathway                                                           | 11   | 1.E-06 | 1.E-04     | 1.23         | 469             | 3420            | 0.11          | 269              | 1338        |
| Sphingosine 1-phosphate (S1P) pathway                                      | 12   | 1.E-06 | 1.E-04     | 1.23         | 442             | 3201            | 0.11          | 255              | 1310        |
| Alpha9 beta1 integrin signaling events                                     | 13   | 1.E-06 | 1.E-04     | 1.23         | 437             | 3164            | 0.11          | 254              | 1307        |
| Signaling events mediated by Hepatocyte Growth Factor Receptor (c-Met)     | 14   | 1.E-06 | 2.E-04     | 1.23         | 433             | 3138            | 0.10          | 251              | 1293        |
| Glypican 1 network                                                         | 15   | 2.E-06 | 2.E-04     | 1.23         | 439             | 3189            | 0.11          | 255              | 1299        |
| Syndecan-1-mediated signaling events                                       | 16   | 2.E-06 | 2.E-04     | 1.23         | 434             | 3149            | 0.10          | 252              | 1300        |
| Arf6 downstream pathway                                                    | 17   | 2.E-06 | 1.E-04     | 1.23         | 431             | 3125            | 0.10          | 250              | 1288        |
| S1P1 pathway                                                               | 17   | 2.E-06 | 1.E-04     | 1.23         | 431             | 3125            | 0.10          | 250              | 1288        |
| mTOR signaling pathway                                                     | 17   | 2.E-06 | 1.E-04     | 1.23         | 431             | 3125            | 0.10          | 250              | 1288        |
| Class I PI3K signaling events mediated by Akt                              | 17   | 2.E-06 | 1.E-04     | 1.23         | 431             | 3125            | 0.10          | 250              | 1288        |
| Arf6 trafficking events                                                    | 17   | 2.E-06 | 1.E-04     | 1.23         | 431             | 3125            | 0.10          | 250              | 1288        |
| ErbB1 downstream signaling                                                 | 17   | 2.E-06 | 1.E-04     | 1.23         | 431             | 3125            | 0.10          | 250              | 1288        |
| Signaling events mediated by focal adhesion kinase                         | 17   | 2.E-06 | 1.E-04     | 1.23         | 431             | 3125            | 0.10          | 250              | 1288        |
| Arf6 signaling events                                                      | 17   | 2.E-06 | 1.E-04     | 1.23         | 431             | 3125            | 0.10          | 250              | 1288        |
| Insulin Pathway                                                            | 17   | 2.E-06 | 1.E-04     | 1.23         | 431             | 3125            | 0.10          | 250              | 1288        |
| Urokinase-type plasminogen activator (uPA) and uPAR-mediated signaling     | 17   | 2.E-06 | 1.E-04     | 1.23         | 431             | 3125            | 0.10          | 250              | 1288        |
| Internalization of ErbB1                                                   | 17   | 2.E-06 | 1.E-04     | 1.23         | 431             | 3125            | 0.10          | 250              | 1288        |
| Class I PI3K signaling events                                              | 17   | 2.E-06 | 1.E-04     | 1.23         | 431             | 3125            | 0.10          | 250              | 1288        |
| EGF receptor (ErbB1) signaling pathway                                     | 17   | 2.E-06 | 1.E-04     | 1.23         | 431             | 3125            | 0.10          | 250              | 1288        |
| PDGFR-beta signaling pathway                                               | 17   | 2.E-06 | 1.E-04     | 1.23         | 431             | 3125            | 0.10          | 250              | 1288        |
| LKB1 signaling events                                                      | 31   | 2.E-06 | 9.E-05     | 1.23         | 435             | 3159            | 0.10          | 251              | 1308        |
| IFN-gamma pathway                                                          | 32   | 2.E-06 | 8.E-05     | 1.23         | 432             | 3135            | 0.10          | 251              | 1297        |
| EGFR-dependent Endothelin signaling events                                 | 33   | 2.E-06 | 8.E-05     | 1.23         | 431             | 3128            | 0.10          | 250              | 1289        |
| GMCSF-mediated signaling events                                            | 33   | 2.E-06 | 8.E-05     | 1.23         | 431             | 3128            | 0.10          | 250              | 1293        |
| PDGF receptor signaling network                                            | 35   | 2.E-06 | 8.E-05     | 1.23         | 435             | 3162            | 0.10          | 253              | 1294        |
| IL3-mediated signaling events                                              | 36   | 2.E-06 | 8.E-05     | 1.23         | 431             | 3130            | 0.10          | 250              | 1296        |
| ErbB receptor signaling network                                            | 37   | 2.E-06 | 1.E-04     | 1.22         | 439             | 3203            | 0.11          | 257              | 1311        |
| IGF1 pathway                                                               | 38   | 2.E-06 | 1.E-04     | 1.23         | 431             | 3138            | 0.10          | 250              | 1291        |
| Nectin adhesion pathway                                                    | 39   | 3.E-06 | 1.E-04     | 1.23         | 432             | 3148            | 0.10          | 251              | 1295        |
| Plasma membrane estrogen receptor signaling                                | 40   | 3.E-06 | 1.E-04     | 1.23         | 431             | 3143            | 0.10          | 250              | 1300        |
| TRAIL signaling pathway                                                    | 41   | 3.E-06 | 1.E-04     | 1.22         | 439             | 3209            | 0.11          | 255              | 1327        |
| Integrin-linked kinase signaling                                           | 42   | 3.E-06 | 1.E-04     | 1.32         | 242             | 1634            | 0.06          | 126              | 656         |
| Endothelins                                                                | 43   | 3.E-06 | 1.E-04     | 1.22         | 438             | 3203            | 0.11          | 254              | 1306        |
| Regulation of CDC42 activity                                               | 44   | 1.E-05 | 5.E-04     | 1.27         | 283             | 1995            | 0.07          | 152              | 772         |
| CDC42 signaling events                                                     | 45   | 1.E-05 | 5.E-04     | 1.27         | 281             | 1980            | 0.07          | 151              | 759         |
| Beta1 integrin cell surface interactions                                   | 46   | 2.E-05 | 6.E-04     | 1.19         | 461             | 3447            | 0.11          | 269              | 1352        |
| Integrin family cell surface interactions                                  | 47   | 2.E-05 | 7.E-04     | 1.19         | 467             | 3503            | 0.11          | 273              | 1379        |
| AP-1 transcription factor network                                          | 48   | 2.E-05 | 7.E-04     | 1.30         | 225             | 1546            | 0.05          | 119              | 623         |
| Validated targets of C-MYC transcriptional activation                      | 49   | 5.E-05 | 2.E-03     | 1.97         | 36              | 163             | 0.01          | 17               | 78          |
| Glypican 3 network                                                         | 50   | 1.E-04 | 5.E-03     | 1.38         | 123             | 797             | 0.03          | 59               | 206         |
| Regulation of nuclear beta catenin signaling and target gene transcription | 51   | 2.E-04 | 5.E-03     | 1.51         | 77              | 455             | 0.02          | 37               | 135         |
| N-cadherin signaling events                                                | 52   | 2.E-04 | 7.E-03     | 1.37         | 122             | 797             | 0.03          | 63               | 251         |
| Canonical Wnt signaling pathway                                            | 53   | 3.E-04 | 8.E-03     | 1.48         | 79              | 478             | 0.02          | 39               | 155         |
| Calcineurin-regulated NFAT-dependent transcription in lymphocytes          | 54   | 3.E-04 | 9.E-03     | 2.23         | 21              | 84              | 0.01          | 11               | 50          |
