# Supplementary material for: Embryonic Stem Cell (ES)-Specific Enhancers Specify the Expression Potential of ES Genes in Cancer
Source: PubMed Central journal article supplement (PMC4757527; doi:10.1371/journal.pgen.1005840), 2016-02-17

**A****Non-promoter methylation sites (n=179,910)**

| From                  | To                     | H3K4me1 |        |       | Fraction of H3K4me1 sites (%) |        |      |
|-----------------------|------------------------|---------|--------|-------|-------------------------------|--------|------|
|                       |                        | Lose    | Retain | Gain  | Lose                          | Retain | Gain |
| ES                    | HSC                    | 49031   | 20380  | 10314 | 61.5                          | 25.6   | 12.9 |
| ES                    | T (CD4 <sup>+</sup> )  | 49455   | 19956  | 11375 | 61.2                          | 24.7   | 14.1 |
| HSC                   | T (CD4 <sup>+</sup> )  | 11802   | 18892  | 12439 | 27.4                          | 43.8   | 28.8 |
| HSC                   | T (CD8 <sup>+</sup> )  | 11422   | 19272  | 13735 | 25.7                          | 43.4   | 30.9 |
| HSC                   | B (CD19 <sup>+</sup> ) | 14155   | 16539  | 6780  | 37.8                          | 44.1   | 18.1 |
| T (CD4 <sup>+</sup> ) | B (CD19 <sup>+</sup> ) | 15754   | 15577  | 7742  | 40.3                          | 39.9   | 19.8 |
| T (CD4 <sup>+</sup> ) | T (CD8 <sup>+</sup> )  | 3331    | 28000  | 5007  | 9.2                           | 77.1   | 13.8 |

**B****Enhancers**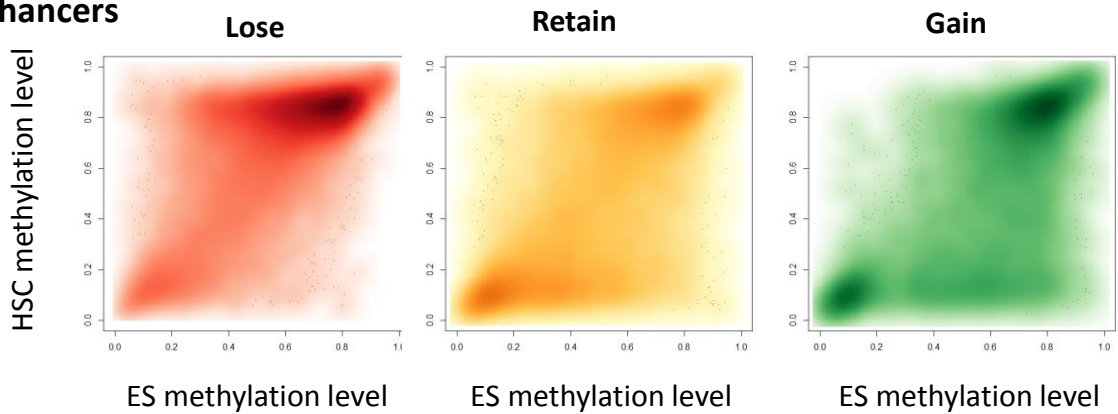**C****Promoters**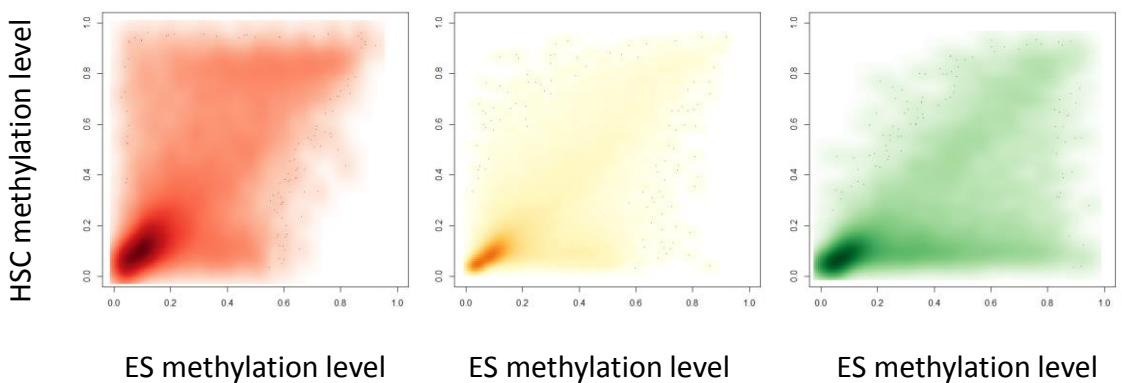

Supplement: pgen.1005840.s005.pdf [file pgen.1005840.s005.pdf]
