# Supplementary material for: Embryonic Stem Cell (ES)-Specific Enhancers Specify the Expression Potential of ES Genes in Cancer
Source: PubMed Central journal article supplement (PMC4757527; doi:10.1371/journal.pgen.1005840), 2016-02-17

**A****Promoter H3K4me3 sites (n=229,306 )**

| From                  | To                     | H3K4me3 |        |       | % of H3K4me3 sites |        |       |
|-----------------------|------------------------|---------|--------|-------|--------------------|--------|-------|
|                       |                        | Red     | Yellow | Green | Red                | Yellow | Green |
| ES                    | HSC                    | 19269   | 106049 | 14859 | 13.7               | 75.7   | 10.6  |
| ES                    | T (CD4 <sup>+</sup> )  | 28831   | 96487  | 15157 | 20.5               | 68.7   | 10.8  |
| HSC                   | T (CD4 <sup>+</sup> )  | 18927   | 101981 | 9663  | 14.5               | 78.1   | 7.4   |
| HSC                   | B (CD19 <sup>+</sup> ) | 14665   | 106243 | 10650 | 11.1               | 80.8   | 8.1   |
| T (CD4 <sup>+</sup> ) | B (CD19 <sup>+</sup> ) | 14510   | 102383 | 9261  | 11.5               | 81.2   | 7.3   |
| T (CD4 <sup>+</sup> ) | T (CD8 <sup>+</sup> )  | 5685    | 105959 | 2945  | 5.0                | 92.5   | 2.6   |

**B**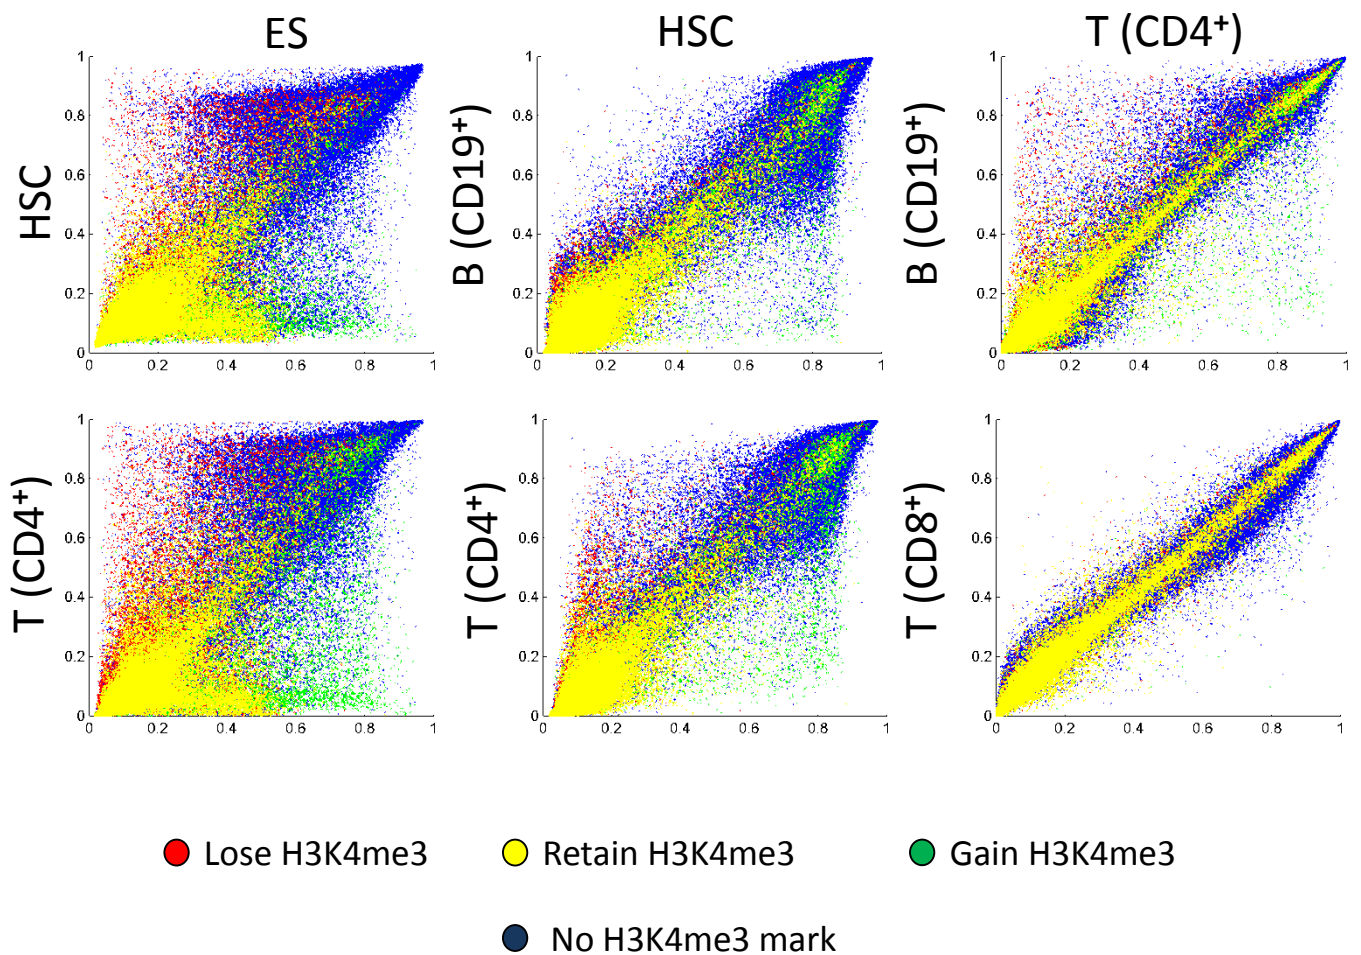

Supplement: pgen.1005840.s006.pdf [file pgen.1005840.s006.pdf]
