# Supplementary material for: Embryonic Stem Cell (ES)-Specific Enhancers Specify the Expression Potential of ES Genes in Cancer
Source: PubMed Central journal article supplement (PMC4757527; doi:10.1371/journal.pgen.1005840), 2016-02-17

## HSC vs. ES

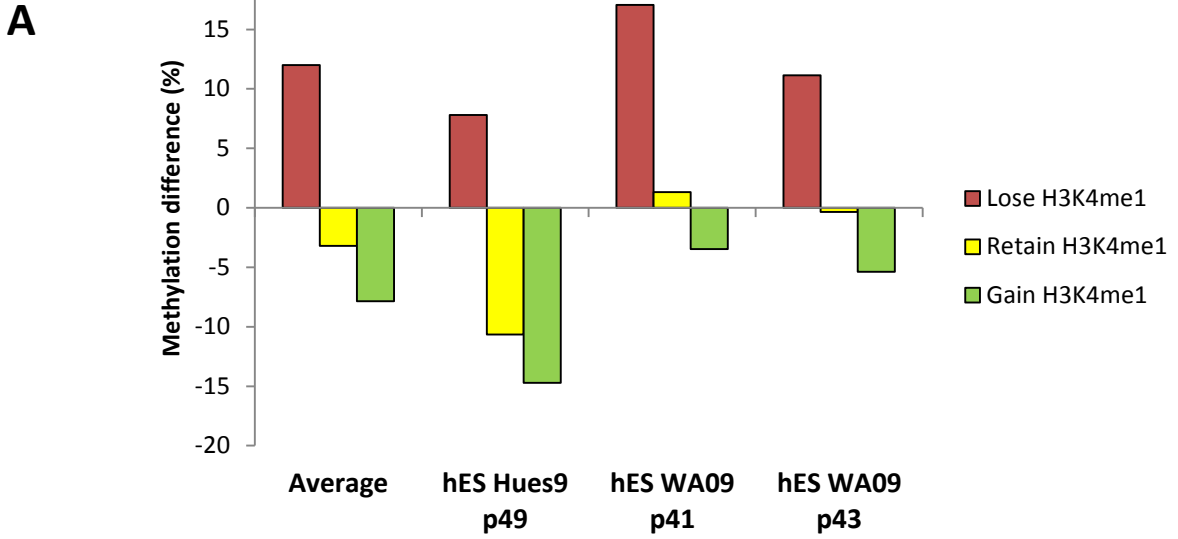

## T cell leukemia vs. T cells

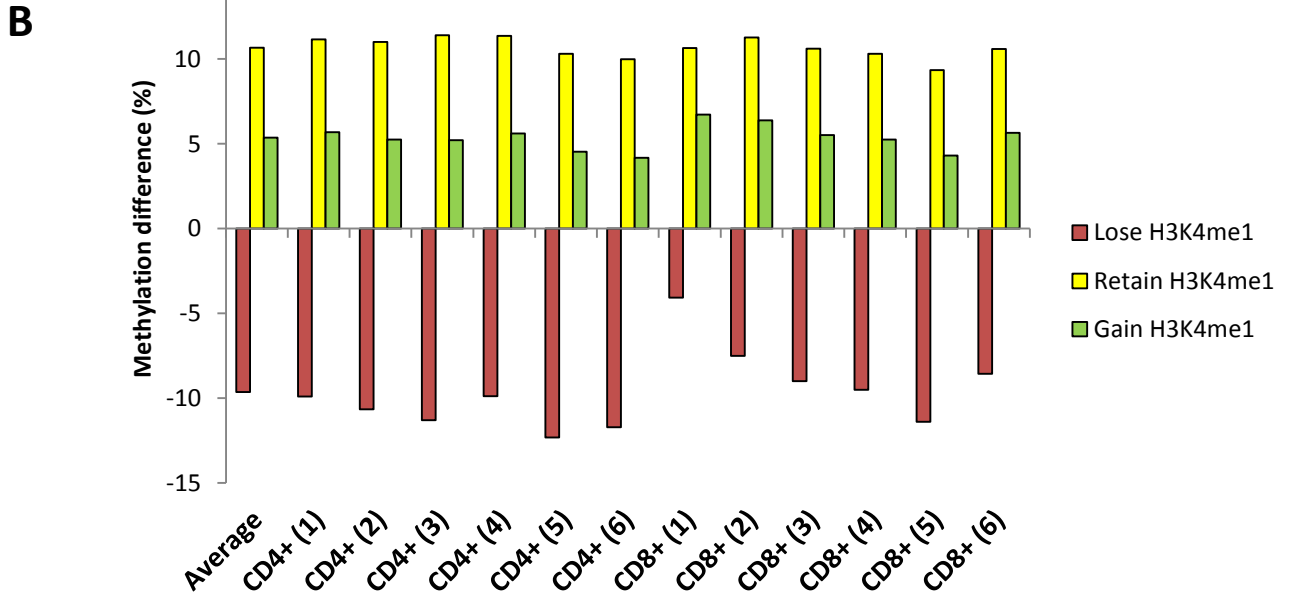

Supplement: pgen.1005840.s007.pdf [file pgen.1005840.s007.pdf]
