# Supplementary material for: Embryonic Stem Cell (ES)-Specific Enhancers Specify the Expression Potential of ES Genes in Cancer
Source: PubMed Central journal article supplement (PMC4757527; doi:10.1371/journal.pgen.1005840), 2016-02-17
Supplement: pgen.1005840.s008.pdf [file pgen.1005840.s008.pdf]

**Loss of H3K4me1 in T cells vs.  
HSC**

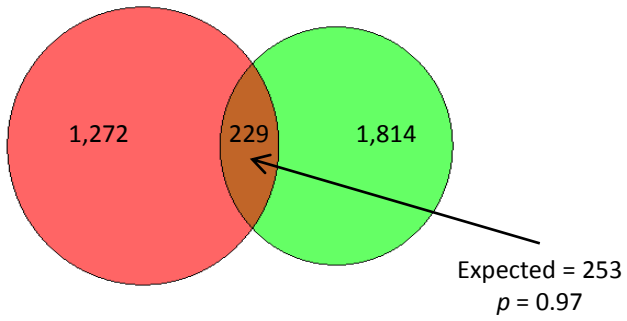

- Hypomethylated in cancer versus normal T cells
- Hypermethylated in T cells versus HSCs
