# Supplementary material for: Embryonic Stem Cell (ES)-Specific Enhancers Specify the Expression Potential of ES Genes in Cancer
Source: PLoS Genet. 2016 Feb 17;12(2):e1005840. doi: 10.1371/journal.pgen.1005840 (PMC4757527; doi:10.1371/journal.pgen.1005840)
Supplement: S1 Dataset — (XLSX) [file pgen.1005840.s001.xlsx]

## Sheet: hyper
# GREAT version 2.0.2	Species assembly: hg19	Association rule: Single nearest gene: 1000000 bp max extension, curated regulatory domains included
# Ontology	Term Name	Hyper Rank	Hyper Raw P-Value	Hyper FDR Q-Val	Hyper Fold Enrichment	Hyper Foreground Region Hits	Hyper Total Regions	Hyper Region Set Coverage	Hyper Foreground Gene Hits	Total Genes Annotated
GO Molecular Function	nucleic acid binding transcription factor activity	1	3.69805e-130	1.25771e-126	1.7178	1116	2383	0.453474	199	1011
GO Molecular Function	sequence-specific DNA binding transcription factor activity	1	3.69805e-130	1.25771e-126	1.7178	1116	2383	0.453474	199	1009
GO Molecular Function	sequence-specific DNA binding	3	1.04418e-121	1.18375e-118	1.7674	995	2065	0.404307	170	663
GO Molecular Function	DNA binding	4	6.3865e-99	5.43012e-96	1.49757	1302	3189	0.529053	250	2375
GO Molecular Function	nucleic acid binding	5	3.64088e-88	2.47652e-85	1.42852	1381	3546	0.561154	290	3393
GO Molecular Function	regulatory region DNA binding	6	1.14578e-51	6.49467e-49	1.80452	459	933	0.186509	73	293
GO Molecular Function	transcription regulatory region sequence-specific DNA binding	7	4.49382e-51	2.18336e-48	2.06981	316	560	0.128403	38	90
GO Molecular Function	transcription regulatory region DNA binding	8	1.20874e-50	5.13866e-48	1.79844	455	928	0.184884	71	284
GO Molecular Function	sequence-specific DNA binding RNA polymerase II transcription factor activity	9	7.8988e-36	2.98487e-33	1.77435	342	707	0.138968	54	155
GO Molecular Function	RNA polymerase II regulatory region DNA binding	10	2.90447e-25	9.8781e-23	2.13844	144	247	0.0585128	15	32
GO Molecular Function	RNA polymerase II regulatory region sequence-specific DNA binding	10	2.90447e-25	9.8781e-23	2.13844	144	247	0.0585128	15	31
GO Molecular Function	core promoter sequence-specific DNA binding	12	1.51864e-23	4.30407e-21	2.46245	96	143	0.0390085	8	14
GO Molecular Function	core promoter binding	13	7.02656e-22	1.83825e-19	2.37926	96	148	0.0390085	8	26
GO Molecular Function	protein binding transcription factor activity	14	3.72601e-19	9.05154e-17	1.55597	291	686	0.118245	53	453
GO Molecular Function	transcription factor binding transcription factor activity	15	6.77815e-19	1.53683e-16	1.56719	279	653	0.113368	49	442
GO Molecular Function	RNA polymerase II transcription coactivator activity	16	3.97363e-18	8.44644e-16	2.59154	65	92	0.026412	6	14
GO Molecular Function	enhancer binding	17	5.95767e-18	1.19188e-15	2.49283	70	103	0.0284437	9	16
GO Molecular Function	RNA polymerase II core promoter sequence-specific DNA binding	18	1.04947e-17	1.98292e-15	2.57971	64	91	0.0260057	4	8
GO Molecular Function	transcription cofactor activity	19	1.13815e-17	2.03728e-15	1.56352	263	617	0.106867	46	434
GO Molecular Function	enhancer sequence-specific DNA binding	20	1.51518e-17	2.57657e-15	2.48131	69	102	0.0280374	8	13
GO Biological Process	nervous system development	1	1.58557e-105	1.38912e-101	1.6489	1060	2358	0.430719	243	1607
GO Biological Process	multicellular organismal development	2	1.55643e-94	6.81795e-91	1.42827	1438	3693	0.584315	394	3630
GO Biological Process	cell differentiation	3	2.21434e-94	6.46661e-91	1.54255	1167	2775	0.474197	265	2220
GO Biological Process	cellular developmental process	4	1.10815e-93	2.42712e-90	1.5363	1174	2803	0.477042	269	2286
GO Biological Process	developmental process	5	1.60241e-93	2.80775e-90	1.40953	1481	3854	0.601788	418	3975
GO Biological Process	anatomical structure development	6	3.15698e-93	4.60972e-90	1.44171	1391	3539	0.565217	377	3388
GO Biological Process	system development	7	3.3049e-92	4.13632e-89	1.45892	1338	3364	0.543681	350	3046
GO Biological Process	central nervous system development	8	6.44208e-91	7.05489e-88	1.86642	691	1358	0.28078	123	618
GO Biological Process	pattern specification process	9	8.75941e-90	8.5268e-87	1.92877	631	1200	0.2564	95	376
GO Biological Process	regulation of transcription, DNA-dependent	10	3.17509e-87	2.7817e-84	1.42755	1375	3533	0.558716	307	2988
GO Biological Process	regulation of RNA metabolic process	11	8.42908e-87	6.71338e-84	1.42353	1382	3561	0.56156	311	3069
GO Biological Process	regulation of nucleobase-containing compound metabolic process	12	1.30247e-86	9.50912e-84	1.39775	1453	3813	0.59041	355	3604
GO Biological Process	regulation of nitrogen compound metabolic process	13	5.49276e-86	3.7017e-83	1.39542	1454	3822	0.590817	356	3679
GO Biological Process	organ development	14	1.01276e-84	6.33773e-82	1.51994	1130	2727	0.459163	259	2097
GO Biological Process	tissue development	15	3.71392e-84	2.16918e-81	1.73237	784	1660	0.31857	149	1002
GO Biological Process	brain development	16	7.98462e-84	4.37208e-81	1.94822	580	1092	0.235677	95	450
GO Biological Process	regulation of cellular macromolecule biosynthetic process	17	2.47966e-82	1.2779e-79	1.40726	1385	3610	0.562779	316	3211
GO Biological Process	regulation of macromolecule biosynthetic process	18	1.17325e-81	5.71046e-79	1.40286	1391	3637	0.565217	320	3272
GO Biological Process	regulation of cellular biosynthetic process	19	1.92189e-81	8.86195e-79	1.39424	1414	3720	0.574563	337	3441
GO Biological Process	regulation of biosynthetic process	20	4.09057e-81	1.79187e-78	1.39247	1416	3730	0.575376	339	3468
GO Cellular Component	nucleus	1	1.47335e-51	1.65752e-48	1.26324	1526	4431	0.620073	390	5650
GO Cellular Component	transcription factor complex	2	1.34469e-40	7.56389e-38	1.85597	338	668	0.137343	50	279
GO Cellular Component	intracellular membrane-bounded organelle	3	4.07373e-32	1.52765e-29	1.15591	1766	5604	0.717595	540	9012
GO Cellular Component	membrane-bounded organelle	4	8.70873e-32	2.44933e-29	1.15488	1766	5609	0.717595	540	9022
GO Cellular Component	intracellular organelle	5	1.05029e-29	2.36315e-27	1.13588	1854	5987	0.753352	592	10049
GO Cellular Component	organelle	6	2.55545e-29	4.79147e-27	1.13474	1854	5993	0.753352	592	10065
GO Cellular Component	nucleoplasm part	7	2.21486e-23	3.55959e-21	1.48903	423	1042	0.171881	76	774
GO Cellular Component	nucleoplasm	8	3.92449e-18	5.51882e-16	1.35823	511	1380	0.207639	108	1436
GO Cellular Component	intracellular part	9	7.78649e-16	9.73312e-14	1.08028	1965	6672	0.798456	667	11706
GO Cellular Component	nuclear lumen	10	3.02617e-15	3.40444e-13	1.29353	572	1622	0.232426	131	1982
GO Cellular Component	intracellular	11	6.90071e-13	7.05754e-11	1.06872	1983	6806	0.80577	680	12087
GO Cellular Component	intracellular organelle lumen	12	7.82598e-13	7.33685e-11	1.25524	591	1727	0.240146	145	2403
GO Cellular Component	organelle lumen	13	2.45265e-12	2.12249e-10	1.24793	593	1743	0.240959	147	2445
GO Cellular Component	nuclear part	14	5.86745e-12	4.71491e-10	1.24216	595	1757	0.241772	147	2334
GO Cellular Component	membrane-enclosed lumen	15	6.6065e-12	4.95488e-10	1.24145	595	1758	0.241772	149	2489
GO Cellular Component	nuclear chromatin	16	4.38047e-05	0.00308002	1.48651	77	190	0.0312881	10	115
GO Cellular Component	terminal button	17	0.000132911	0.00879559	2.17789	19	32	0.00772044	7	43
GO Cellular Component	cell	18	0.000435195	0.0271997	1.0182	2274	8192	0.924015	871	15461
GO Cellular Component	cell part	18	0.000435195	0.0271997	1.0182	2274	8192	0.924015	871	15460
GO Cellular Component	nuclear chromosome	20	0.000505312	0.0284238	1.34685	94	256	0.0381959	17	256
Mouse Phenotype	lethality during fetal growth through weaning	1	3.66919e-96	2.67594e-92	1.56707	1133	2652	0.460382	247	1919
Mouse Phenotype	perinatal lethality	2	7.56364e-87	2.75808e-83	1.70021	845	1823	0.343356	165	1123
Mouse Phenotype	abnormal survival	3	9.40953e-84	2.28746e-80	1.43329	1327	3396	0.539212	329	3297
Mouse Phenotype	preweaning lethality	4	4.29346e-83	7.82805e-80	1.46044	1251	3142	0.50833	304	2846
Mouse Phenotype	mortality/aging	5	1.05159e-81	1.53384e-78	1.4208	1341	3462	0.5449	336	3507
Mouse Phenotype	neonatal lethality	6	5.46534e-75	6.64312e-72	1.77077	672	1392	0.27306	128	809
Mouse Phenotype	abnormal nervous system morphology	7	4.88472e-73	5.08918e-70	1.51867	1021	2466	0.414872	246	2001
Mouse Phenotype	nervous system phenotype	8	1.28562e-69	1.172e-66	1.47181	1087	2709	0.44169	285	2465
Mouse Phenotype	abnormal nervous system development	9	4.81211e-66	3.89941e-63	1.66475	718	1582	0.291751	140	954
Mouse Phenotype	abnormal embryogenesis/ development	10	6.38689e-64	4.65796e-61	1.60399	781	1786	0.317351	152	1393
Mouse Phenotype	abnormal embryonic tissue morphology	11	1.7015e-63	1.1281e-60	1.6961	658	1423	0.267371	109	793
Mouse Phenotype	abnormal brain morphology	12	3.24776e-63	1.97383e-60	1.60334	775	1773	0.314913	167	1251
Mouse Phenotype	mammalian phenotype	13	2.7066e-58	1.5184e-55	1.25279	1664	4872	0.676148	515	6429
Mouse Phenotype	postnatal lethality	14	1.27762e-56	6.65547e-54	1.63848	662	1482	0.268996	149	1125
Mouse Phenotype	abnormal forebrain morphology	15	2.91682e-56	1.41816e-53	1.68291	607	1323	0.246648	130	764
Mouse Phenotype	complete neonatal lethality	16	1.66687e-55	7.59782e-53	1.75184	533	1116	0.216579	98	567
Mouse Phenotype	abnormal neuron morphology	17	1.22026e-53	5.23493e-51	1.57295	720	1679	0.292564	157	1188
Mouse Phenotype	abnormal brain development	18	1.80902e-53	7.32955e-51	1.73975	526	1109	0.213734	88	598
Mouse Phenotype	abnormal gland morphology	19	2.87615e-51	1.10399e-48	1.61232	640	1456	0.260057	134	1186
Mouse Phenotype	abnormal craniofacial morphology	20	3.65114e-50	1.33139e-47	1.62551	612	1381	0.248679	117	846
Human Phenotype	Abnormality of the axial skeleton	1	2.0119e-43	1.20352e-39	1.92928	324	616	0.131654	59	596
Human Phenotype	Aplasia/Hypoplasia involving the skeleton	2	1.69318e-37	5.06429e-34	2.10817	223	388	0.0906136	33	245
Human Phenotype	Aplasia/Hypoplasia affecting bones of the axial skeleton	3	3.39364e-30	6.76693e-27	2.09111	183	321	0.07436	28	183
Human Phenotype	Abnormality of the upper limb	4	1.54245e-27	2.30674e-24	1.94473	202	381	0.0820805	34	344
Human Phenotype	Abnormality of head and neck	5	1.90876e-27	2.28364e-24	1.66822	322	708	0.130841	70	770
Human Phenotype	Abnormality of the anus	6	6.03808e-27	6.01997e-24	2.62784	96	134	0.0390085	7	31
Human Phenotype	Aplasia/Hypoplasia involving forearm bones	7	6.99967e-27	5.98172e-24	2.72045	89	120	0.0361642	4	30
Human Phenotype	Abnormality of the head	8	7.77529e-27	5.81397e-24	1.66207	319	704	0.129622	68	755
Human Phenotype	Polydactyly (hands)	9	1.3034e-26	8.66327e-24	2.37817	118	182	0.047948	12	60
Human Phenotype	Abnormality of the phalanges of the hand	10	1.67395e-26	1.00136e-23	2.15171	149	254	0.0605445	17	144
Human Phenotype	Anal stenosis	11	1.8968e-26	1.03151e-23	2.74304	86	115	0.0349451	4	11
Human Phenotype	Abnormality of the musculoskeletal system	12	2.55438e-26	1.27336e-23	1.60504	354	809	0.143844	80	1041
Human Phenotype	Abnormality of the hand	13	4.34425e-26	1.99902e-23	1.92743	196	373	0.0796424	33	321
Human Phenotype	Anal atresia	14	4.38046e-26	1.87171e-23	2.61208	94	132	0.0381959	6	27
Human Phenotype	Abnormality of the thorax	15	8.66321e-26	3.45489e-23	1.99153	177	326	0.071922	26	258
Human Phenotype	Abnormality of the face	16	3.36012e-25	1.25626e-22	1.66026	301	665	0.122308	62	670
Human Phenotype	Abnormality of the fingers	17	3.81154e-25	1.34122e-22	1.98924	173	319	0.0702966	26	223
Human Phenotype	Polydactyly	18	7.52466e-25	2.5007e-22	2.29734	119	190	0.0483543	13	68
Human Phenotype	Phenotypic abnormality	19	2.32643e-24	7.32457e-22	1.44737	496	1257	0.201544	125	1815
Human Phenotype	Abnormality of the penis	20	2.35792e-24	7.05254e-22	2.18099	132	222	0.0536367	16	115
Disease Ontology	medical disorder	1	1.78518e-51	3.98631e-48	1.76676	486	1009	0.197481	106	857
Disease Ontology	physical disorder	2	2.58364e-42	2.88464e-39	1.98235	294	544	0.119464	47	253
Disease Ontology	congenital heart defect	3	2.31625e-26	1.72406e-23	2.52796	102	148	0.0414466	10	57
Disease Ontology	ventricular septal defect	4	4.96624e-25	2.7724e-22	2.92617	71	89	0.0288501	4	6
Disease Ontology	heart septal defect	5	7.07185e-24	3.15829e-21	2.81859	73	95	0.0296627	6	19
Disease Ontology	syndrome	6	7.00823e-19	2.60823e-16	1.35646	534	1444	0.216985	140	1898
Disease Ontology	disease	7	6.31511e-17	2.01452e-14	1.12948	1519	4933	0.617229	526	7910
Disease Ontology	congenital nervous system abnormality	8	1.83028e-14	5.10876e-12	1.96151	100	187	0.0406339	12	51
Disease Ontology	pervasive developmental disease	9	2.16136e-12	5.36258e-10	1.76552	116	241	0.0471353	31	203
Disease Ontology	cancer	10	2.71799e-11	6.06927e-09	1.14253	1093	3509	0.444128	347	5127
Disease Ontology	microcephaly	11	9.28432e-11	1.88472e-08	2.09601	60	105	0.0243803	6	30
Disease Ontology	congenital nystagmus	12	1.4252e-10	2.65206e-08	2.82156	30	39	0.0121902	1	6
Disease Ontology	myopia	13	4.27275e-10	7.33926e-08	2.40526	40	61	0.0162536	9	40
Disease Ontology	neuroendocrine tumor	14	5.88141e-10	9.38084e-08	1.36485	272	731	0.110524	66	827
Disease Ontology	refractive error	15	1.15338e-09	1.717e-07	2.02615	58	105	0.0235677	10	54
Disease Ontology	autism	16	1.43161e-09	1.99799e-07	1.69689	99	214	0.0402276	27	188
Disease Ontology	autism spectrum disease	17	2.08825e-09	2.74298e-07	1.68258	100	218	0.0406339	28	193
Disease Ontology	sarcoma	18	2.32319e-09	2.88205e-07	1.27357	392	1129	0.159285	99	1328
Disease Ontology	neuroepithelial neoplasm	19	2.78228e-09	3.26991e-07	1.25585	429	1253	0.174319	109	1447
Disease Ontology	neural neoplasm	20	3.96492e-09	4.42683e-07	1.25285	429	1256	0.174319	109	1454
MSigDB Cancer Neighborhood	Neighborhood of NOS2A	1	6.14611e-13	2.62439e-10	1.72306	132	281	0.0536367	19	279
MSigDB Cancer Neighborhood	Neighborhood of PAX7	2	1.08962e-12	2.32633e-10	1.71611	131	280	0.0532304	19	246
MSigDB Cancer Neighborhood	Neighborhood of MAGEA9	3	6.77316e-12	9.64047e-10	1.66728	135	297	0.0548558	27	408
MSigDB Cancer Neighborhood	Neighborhood of CAMK4	4	4.5695e-11	4.87794e-09	1.8241	92	185	0.0373832	17	282
MSigDB Cancer Neighborhood	Neighborhood of ARL3	5	2.59501e-10	2.21614e-08	1.62313	127	287	0.051605	19	294
MSigDB Cancer Neighborhood	Neighborhood of RAD51L3	6	3.17281e-10	2.25798e-08	1.64715	119	265	0.0483543	29	372
MSigDB Cancer Neighborhood	Neighborhood of IFNA1	7	4.6082e-09	2.811e-07	1.87601	67	131	0.0272247	15	194
MSigDB Cancer Neighborhood	Neighborhood of PTPRB	8	1.68773e-08	9.00826e-07	1.77408	74	153	0.0300691	16	246
MSigDB Cancer Neighborhood	Neighborhood of STK17A	9	2.72175e-08	1.29132e-06	1.64795	93	207	0.0377895	13	155
MSigDB Cancer Neighborhood	Neighborhood of SUPT3H	10	2.8624e-08	1.22224e-06	1.64188	94	210	0.0381959	25	321
MSigDB Cancer Neighborhood	Neighborhood of MDM2	11	3.27491e-08	1.27126e-06	1.65243	91	202	0.0369768	14	273
MSigDB Cancer Neighborhood	Neighborhood of IL16	12	8.0292e-08	2.85706e-06	1.65157	86	191	0.0349451	11	231
MSigDB Cancer Neighborhood	Neighborhood of ATF2	13	8.45647e-08	2.77762e-06	1.64494	87	194	0.0353515	23	320
MSigDB Cancer Neighborhood	Neighborhood of FOSL1	14	1.47302e-07	4.4927e-06	1.4716	134	334	0.0544494	25	393
MSigDB Cancer Neighborhood	Neighborhood of IL4	15	1.97641e-07	5.62617e-06	1.85084	55	109	0.0223486	11	181
MSigDB Cancer Neighborhood	Neighborhood of MAP2K7	16	2.2643e-07	6.04286e-06	1.7767	62	128	0.025193	15	173
MSigDB Cancer Neighborhood	Neighborhood of FSHR	17	4.05609e-07	1.01879e-05	1.67353	73	160	0.0296627	19	273
MSigDB Cancer Neighborhood	Neighborhood of PTPRR	18	4.49797e-07	1.06702e-05	2.04361	39	70	0.0158472	6	98
MSigDB Cancer Neighborhood	Neighborhood of ERCC4	19	7.46845e-07	1.67844e-05	1.52834	100	240	0.0406339	19	313
MSigDB Cancer Neighborhood	Neighborhood of CDH4	20	1.00201e-06	2.13929e-05	1.83401	50	100	0.0203169	7	129
Pathway Commons	Synthesis, Secretion, and Inactivation of Glucose-dependent Insulinotropic Polypeptide (GIP)	1	4.88894e-22	7.85653e-19	3.10371	55	65	0.0223486	4	13
Pathway Commons	Incretin Synthesis, Secretion, and Inactivation	2	1.78357e-18	1.4331e-15	2.71705	60	81	0.0243803	6	21
Pathway Commons	Regulation of Insulin Secretion	3	2.07643e-16	1.11227e-13	2.35801	72	112	0.0292564	9	49
Pathway Commons	Integration of energy metabolism	4	3.49473e-12	1.40401e-09	2.06326	72	128	0.0292564	9	84
Pathway Commons	FOXA transcription factor networks	5	1.2004e-10	3.85807e-08	1.92379	75	143	0.0304754	12	82
Pathway Commons	Developmental Biology	6	1.65835e-09	4.44162e-07	1.50313	159	388	0.0646079	39	436
Pathway Commons	FOXA1 transcription factor network	7	7.57729e-09	1.73953e-06	1.95179	58	109	0.0235677	6	44
Pathway Commons	Synthesis, Secretion, and Inactivation of Glucagon-like Peptide-1 (GLP-1)	8	1.71745e-08	3.44992e-06	2.33419	35	55	0.0142219	3	18
Pathway Commons	Regulation of beta-cell development	9	3.16337e-08	5.64837e-06	1.83401	64	128	0.0260057	13	111
Pathway Commons	Regulation of gene expression in beta cells	10	3.17392e-08	5.10049e-06	2.05767	46	82	0.0186916	9	101
Pathway Commons	Wnt	11	5.40209e-08	7.89196e-06	1.88358	57	111	0.0231613	9	82
Pathway Commons	Transcriptional Regulation of White Adipocyte Differentiation	12	3.5592e-07	4.76636e-05	1.87069	51	100	0.0207233	7	69
Pathway Commons	Regulation of Telomerase	13	2.69351e-06	0.00033296	1.83401	46	92	0.0186916	4	68
Pathway Commons	Insulin Synthesis and Processing	14	4.9071e-06	0.000563265	1.85611	42	83	0.0170662	9	135
Pathway Commons	Regulation of retinoblastoma protein	15	7.65951e-05	0.00820589	1.70896	41	88	0.0166599	8	67
Pathway Commons	FOXA2 and FOXA3 transcription factor networks	16	0.000112892	0.0113386	1.9463	26	49	0.0105648	8	44
Pathway Commons	Diabetes pathways	17	0.000404844	0.0382696	1.55313	47	111	0.0190979	12	219
Pathway Commons	CDO in myogenesis	18	0.000502366	0.0448502	1.98271	20	37	0.00812678	4	24
Pathway Commons	Myogenesis	18	0.000502366	0.0448502	1.98271	20	37	0.00812678	4	24
MSigDB Pathway	ALK in cardiac myocytes	1	2.32963e-08	2.05007e-05	2.18986	40	67	0.0162536	7	37
MSigDB Pathway	Genes involved in Regulation of gene expression in beta cells	2	2.51443e-08	1.10635e-05	2.05234	47	84	0.0190979	10	104
MSigDB Pathway	Maturity onset diabetes of the young	3	4.22379e-08	1.23898e-05	1.8827	58	113	0.0235677	11	25
MSigDB Pathway	NFAT and Hypertrophy of the heart (Transcription in the broken heart)	4	1.20665e-07	2.65464e-05	1.85024	57	113	0.0231613	7	53
MSigDB Pathway	Genes involved in Regulation of beta-cell development	5	1.46461e-07	2.57771e-05	1.74423	68	143	0.027631	15	117
MSigDB Pathway	Myocyte Adrenergic Pathway is a specific case of the generalized Adrenergic Pathway.	6	2.60194e-06	0.000381618	2.27068	26	42	0.0105648	3	23
MSigDB Pathway	Multi-step Regulation of Transcription by Pitx2	7	3.15791e-06	0.000396994	2.29251	25	40	0.0101585	2	15
MSigDB Pathway	Genes involved in Insulin Synthesis and Secretion	8	3.83097e-06	0.000421407	1.85559	43	85	0.0174726	9	132
MSigDB Pathway	Genes involved in E2F transcriptional targets at G1/S	9	7.24443e-05	0.00708344	2.24814	19	31	0.00772044	2	22
MSigDB Pathway	Genes involved in Diabetes pathways	10	0.000125309	0.0110272	1.48467	68	168	0.027631	19	378
MSigDB Pathway	G alpha i Pathway	11	0.000205861	0.0164689	1.86861	27	53	0.0109712	3	34
MSigDB Pathway	Adrenergic Pathway	12	0.000264741	0.0194143	1.86997	26	51	0.0105648	2	34
MSigDB Pathway	G alpha q Pathway	13	0.000340622	0.0230575	1.87144	25	49	0.0101585	2	27
MGI Expression: Detected	TS17_brain	1	1.51013e-118	1.259e-114	1.88322	842	1640	0.342137	146	731
MGI Expression: Detected	TS17_forebrain	2	4.23791e-111	1.76657e-107	2.01712	683	1242	0.277529	107	393
MGI Expression: Detected	TS21_central nervous system	3	1.83369e-110	5.09582e-107	1.65821	1080	2389	0.438846	216	1439
MGI Expression: Detected	TS21_nervous system	4	4.32207e-110	9.00827e-107	1.65289	1086	2410	0.441284	217	1467
MGI Expression: Detected	Theiler_stage_15	5	2.00022e-108	3.33517e-105	1.58413	1195	2767	0.485575	264	2028
MGI Expression: Detected	TS28_head	6	1.14379e-107	1.5893e-104	1.86072	801	1579	0.325477	130	523
MGI Expression: Detected	TS15_embryo	7	1.84754e-107	2.20041e-104	1.58617	1184	2738	0.481105	262	1994
MGI Expression: Detected	TS17_organ system	8	1.68668e-103	1.75773e-100	1.51607	1297	3138	0.527022	295	2454
MGI Expression: Detected	TS17_diencephalon	9	3.12789e-102	2.89747e-99	2.18925	530	888	0.21536	69	208
MGI Expression: Detected	TS21_embryo; head	10	3.54508e-102	2.95553e-99	1.72867	919	1950	0.373425	161	852
MGI Expression: Detected	Theiler_stage_19	11	2.35909e-100	1.78798e-97	1.46198	1399	3510	0.568468	356	3091
MGI Expression: Detected	TS17_embryo	12	1.16356e-99	8.08381e-97	1.46615	1383	3460	0.561967	334	3056
MGI Expression: Detected	TS21_thalamus	13	1.97088e-99	1.26394e-96	1.95027	671	1262	0.272653	98	372
MGI Expression: Detected	Theiler_stage_17	14	2.09989e-99	1.25049e-96	1.4653	1383	3462	0.561967	334	3074
MGI Expression: Detected	TS19_embryo	15	5.56127e-99	3.09095e-96	1.4607	1391	3493	0.565217	355	3077
MGI Expression: Detected	TS21_diencephalon	16	1.247e-98	6.49766e-96	1.9089	701	1347	0.284844	108	448
MGI Expression: Detected	TS15_organ system	17	2.55085e-97	1.25097e-94	1.67058	966	2121	0.392523	185	1123
MGI Expression: Detected	TS17_midbrain	18	2.22161e-96	1.02898e-93	2.03021	595	1075	0.241772	89	304
MGI Expression: Detected	TS21_forebrain	19	8.30829e-90	3.64559e-87	1.70063	867	1870	0.352296	166	1048
MGI Expression: Detected	TS28_thalamus	20	8.31794e-90	3.46733e-87	1.61335	998	2269	0.405526	232	1935
MSigDB Perturbation	Set 'Eed targets': genes identified by ChIP on chip as targets of the Polycomb protein EED [Gene ID=8726] in human embryonic stem cells.	1	7.00972e-129	1.66411e-125	1.76912	1036	2148	0.420967	198	1007
MSigDB Perturbation	Set 'H3K27 bound': genes posessing the trimethylated H3K27 (H3K27me3) mark in their promoters in human embryonic stem cells, as identified by ChIP on chip.	2	1.30109e-111	1.5444e-108	1.72134	993	2116	0.403494	210	1060
MSigDB Perturbation	Set 'Suz12 targets': genes identified by ChIP on chip as targets of the Polycomb protein SUZ12 [Gene ID=23512] in human embryonic stem cells.	3	3.65321e-96	2.89091e-93	1.72694	879	1867	0.357172	176	988
MSigDB Perturbation	Set 'PRC2 targets': Polycomb Repression Complex 2 (PRC) targets; identified by ChIP on chip on human embryonic stem cells as genes that: posess the trimethylated H3K27 mark in their promoters and are bound by SUZ12 [Gene ID=23512] and EED [Gene ID=8726] Polycomb proteins.	4	3.06456e-86	1.81881e-83	1.77916	746	1538	0.303129	137	620
MSigDB Perturbation	Genes bearing H3K27me3 mark or whose promoters are bound by the polycomb proteins SUZ12 or EED [Gene ID=23512, 8726]; their DNA is methylated de novo in cancer.	5	6.68743e-39	3.17519e-36	2.36087	177	275	0.071922	18	88
MSigDB Perturbation	Genes up-regulated in the neural crest stem cells (NCS), defined as p75+/HNK1+ [Gene ID=4804, 27087].	6	4.90731e-32	1.94166e-29	2.14656	182	311	0.0739537	22	143
MSigDB Perturbation	Genes up-regulated in hES cells (human embryonic stem cells) after treatment with the ALK [Gene ID=238] inhibitor SB-431542 [PubChem=4521392].	7	3.21494e-24	1.09032e-21	2.701	81	110	0.0329134	5	5
MSigDB Perturbation	Breast cancer compendium: 100 transcription regulators showing most correlated expression with the 9 'embryonic stem cell' transcription factors that are preferentially and coordinately overexpressed in the high-grade, ER-negative breast cancer tumors.	8	1.65429e-22	4.90911e-20	2.14963	126	215	0.0511987	16	100
MSigDB Perturbation	Genes for which mutations result in atrial septation defects, a major class of congenital heart disease.	9	3.32256e-19	8.76417e-17	3.08886	48	57	0.0195043	4	5
MSigDB Perturbation	Genes for which mutations result in developmental defects in ventricular septation and atrioventricular cushion formation, a major class of congenital heart disease.	10	2.42964e-17	5.76796e-15	2.89892	49	62	0.0199106	5	10
MSigDB Perturbation	Up-regulated genes in hepatocellular carcinoma (HCC) subclass G56, defined by unsupervised clustering.	11	9.47398e-17	2.04466e-14	2.79208	51	67	0.0207233	1	12
MSigDB Perturbation	Set 'Oct4 targets': genes upregulated and identified by ChIP on chip as OCT4 [Gene ID=5460] transcription factor targets in human embryonic stem cells.	12	1.1835e-16	2.34136e-14	1.7364	169	357	0.0686713	33	279
MSigDB Perturbation	Genes changed in breast cancer samples according to the ESR1 [Gene ID=2099] status: ER positive vs ER negative tumors.	13	1.54323e-16	2.81817e-14	2.5118	63	92	0.0255993	6	49
MSigDB Perturbation	Genes up-regulated in colorectal adenoma compared to normal mucosa samples.	14	3.22226e-16	5.46403e-14	2.1024	94	164	0.0381959	13	128
MSigDB Perturbation	Selected gradually up-regulated genes whose expression profile follows that of HEMGN [Gene ID=55363] in the TLX1 [Gene ID=3195] Tet On iEBHX15-4 cells (pro-erythroblasts).	15	1.82902e-15	2.89473e-13	2.18463	81	136	0.0329134	9	30
MSigDB Perturbation	Potential marker genes specifically up-regulated in the majority of hepatocellular carcinoma (HCC) tumors.	16	5.32893e-15	7.9068e-13	2.61284	52	73	0.0211296	2	31
MSigDB Perturbation	Genes whose expression is significantly and positively correlated with poor breast cancer clinical outcome (defined as developing distant metastases in less than 5 years).	17	2.88509e-14	4.02894e-12	2.52474	53	77	0.021536	2	44
MSigDB Perturbation	Genes down-regulated in cancer endometrium samples compared to the normal endometrium.	18	3.84148e-14	5.06649e-12	2.34451	62	97	0.025193	6	41
MSigDB Perturbation	Top 200 genes with high histone H3 trimethylation mark at K27 (H3K27me3) in PC3 cells (prostate cancer), by ChIP-chip assay on an 88K microarray (all promoters).	19	1.0323e-13	1.28984e-11	2.00278	89	163	0.0361642	18	186
MSigDB Perturbation	Genes whose expression peaked at 240 min after stimulation of HeLa cells with EGF [Gene ID=1950].	20	2.59695e-13	3.08258e-11	2.32702	59	93	0.023974	8	59
Transcription Factor Targets	Targets of Oct4, identifed by ChIP-chip in embryonic stem cells	1	2.41461e-21	4.58777e-20	1.866	175	344	0.0711093	40	241
Transcription Factor Targets	Targets of Nanog, identifed by ChIP-chip in embryonic stem cells	2	5.06559e-09	4.81231e-08	1.37699	232	618	0.0942706	56	709
Transcription Factor Targets	Targets of Sox2, identifed by ChIP-chip in embryonic stem cells	3	6.96847e-07	4.41336e-06	1.36867	175	469	0.0711093	44	572
Transcription Factor Targets	Targets of HSF1, identified by ChIP-chip in HeLa cells under heat shock	4	3.05394e-05	0.000145062	1.41943	101	261	0.0410402	26	312
MSigDB Predicted Promoter Motifs	Motif TTGTTT matches MLLT7: myeloid/lymphoid or mixed-lineage leukemia (trithorax homolog, Drosophila); translocated to, 7	1	7.35783e-63	4.52507e-60	1.58387	801	1855	0.325477	151	1501
MSigDB Predicted Promoter Motifs	Motif AACTTT (no known TF)	2	8.26977e-58	2.54295e-55	1.56997	770	1799	0.312881	162	1448
MSigDB Predicted Promoter Motifs	Motif CTTTGA matches LEF1: lymphoid enhancer-binding factor 1	3	1.22636e-56	2.51403e-54	1.75035	544	1140	0.221048	105	892
MSigDB Predicted Promoter Motifs	Motif TGAMCTTTGMMCYT matches HNF4A: hepatocyte nuclear factor 4, alpha	4	1.62213e-47	2.49402e-45	2.39219	210	322	0.0853312	19	192
MSigDB Predicted Promoter Motifs	Motif TATAAA matches TAF&lt;br&gt; TATA	5	3.32019e-44	4.08383e-42	1.66609	506	1114	0.205607	99	1035
MSigDB Predicted Promoter Motifs	Motif NNKGAATTAVAVTDN matches POU3F1: POU domain, class 3, transcription factor 1	6	4.2702e-44	4.37695e-42	2.1075	262	456	0.106461	32	194
MSigDB Predicted Promoter Motifs	Motif NANWGGAAAANN matches NFAT&lt;br&gt; NFATC	7	3.44872e-41	3.02995e-39	2.32548	194	306	0.0788297	27	183
MSigDB Predicted Promoter Motifs	Motif NAAWAATTANS matches PAX4: paired box gene 4	8	2.85845e-40	2.19743e-38	2.02505	265	480	0.10768	30	189
MSigDB Predicted Promoter Motifs	Motif NNNTAATTAGCNNN matches VSX1: visual system homeobox 1 homolog, CHX10-like (zebrafish)	9	3.82826e-39	2.61598e-37	2.03958	253	455	0.102804	35	180
MSigDB Predicted Promoter Motifs	Motif TAATTA matches VSX1: visual system homeobox 1 homolog, CHX10-like (zebrafish)	10	1.67545e-38	1.0304e-36	1.6767	437	956	0.17757	80	605
MSigDB Predicted Promoter Motifs	Motif NNNCAMAACACRNA matches FALZ: fetal Alzheimer antigen	11	1.53954e-37	8.60744e-36	2.20081	201	335	0.0816741	22	159
MSigDB Predicted Promoter Motifs	Motif WTGAAAT (no known TF)	12	6.47625e-37	3.31908e-35	1.82833	322	646	0.130841	55	455
MSigDB Predicted Promoter Motifs	Motif NWATAAGTATWT matches NKX3-1: NK3 transcription factor related, locus 1 (Drosophila)	13	3.63091e-35	1.7177e-33	2.13355	203	349	0.0824868	33	177
MSigDB Predicted Promoter Motifs	Motif GGGAGGRR matches MAZ: MYC-associated zinc finger protein (purine-binding transcription factor)	14	1.03227e-34	4.5346e-33	1.46859	639	1596	0.259651	139	1708
MSigDB Predicted Promoter Motifs	Motif NNNNNNNWATGCAAATNNNWNNA matches POU2F1: POU domain, class 2, transcription factor 1	15	1.05678e-34	4.33281e-33	1.9496	253	476	0.102804	30	190
MSigDB Predicted Promoter Motifs	Motif GGGTGGRR matches PAX4: paired box gene 4	16	1.86331e-34	7.16211e-33	1.63662	427	957	0.173507	87	993
MSigDB Predicted Promoter Motifs	Motif GSCCSCRGGCNRNRNN matches GTF3A: general transcription factor IIIA	17	1.7087e-33	6.18149e-32	2.15297	189	322	0.0767981	25	195
MSigDB Predicted Promoter Motifs	Motif TGGAAA matches NFAT&lt;br&gt; NFATC	18	8.39665e-33	2.86886e-31	1.4751	598	1487	0.242991	132	1404
MSigDB Predicted Promoter Motifs	Motif AAAYWAACM matches FOXJ1: forkhead box J1	19	4.07099e-32	1.31772e-30	1.98536	223	412	0.0906136	30	202
MSigDB Predicted Promoter Motifs	Motif NNNGATWANN matches GATA6: GATA binding protein 6	20	2.37917e-31	7.31596e-30	1.98419	218	403	0.0885819	36	190
MSigDB miRNA Motifs	Targets of MicroRNA TAGCTTT,MIR-9	1	5.02499e-29	1.11052e-26	2.00166	197	361	0.0800488	29	196
MSigDB miRNA Motifs	Targets of MicroRNA CTTTGTA,MIR-524	2	1.02773e-23	1.13564e-21	1.72088	251	535	0.101991	55	374
MSigDB miRNA Motifs	Targets of MicroRNA AAAGGAT,MIR-501	3	4.4043e-19	3.2445e-17	2.04727	120	215	0.0487607	15	109
MSigDB miRNA Motifs	Targets of MicroRNA ATGTTTC,MIR-494	4	5.03472e-16	2.78168e-14	2.1562	87	148	0.0353515	14	136
MSigDB miRNA Motifs	Targets of MicroRNA GGCACTT,MIR-519E	5	1.16204e-14	5.13622e-13	2.03288	92	166	0.0373832	13	108
MSigDB miRNA Motifs	Targets of MicroRNA TGAGATT,MIR-216	6	5.49071e-14	2.02241e-12	2.14438	76	130	0.0308818	9	88
MSigDB miRNA Motifs	Targets of MicroRNA AAACCAC,MIR-140	7	1.44856e-13	4.57331e-12	2.0847	79	139	0.0321008	5	89
MSigDB miRNA Motifs	Targets of MicroRNA CTTTGCA,MIR-527	8	6.76423e-12	1.86862e-10	1.68496	130	283	0.0528241	20	199
MSigDB miRNA Motifs	Targets of MicroRNA GTTATAT,MIR-410	9	5.40211e-11	1.32652e-09	1.90547	80	154	0.0325071	8	83
MSigDB miRNA Motifs	Targets of MicroRNA TAATAAT,MIR-126	10	4.67506e-10	1.03319e-08	1.77485	90	186	0.0365705	18	174
MSigDB miRNA Motifs	Targets of MicroRNA ATGTACA,MIR-493	11	6.51158e-10	1.30824e-08	1.59479	130	299	0.0528241	31	257
MSigDB miRNA Motifs	Targets of MicroRNA ATATGCA,MIR-448	12	7.58972e-10	1.39777e-08	1.7129	99	212	0.0402276	20	157
MSigDB miRNA Motifs	Targets of MicroRNA GGCGGCA,MIR-371	13	2.90293e-09	4.93499e-08	2.86564	25	32	0.0101585	1	5
MSigDB miRNA Motifs	Targets of MicroRNA ACTGAAA,MIR-30A-3P,MIR-30E-3P	14	1.12422e-08	1.77465e-07	1.67219	93	204	0.0377895	13	162
MSigDB miRNA Motifs	Targets of MicroRNA TTGGGAG,MIR-150	15	2.98119e-08	4.39229e-07	2.09601	44	77	0.0178789	2	67
MSigDB miRNA Motifs	Targets of MicroRNA ATACTGT,MIR-144	16	7.44425e-08	1.02824e-06	1.51997	121	292	0.049167	19	172
MSigDB miRNA Motifs	Targets of MicroRNA ATGTTAA,MIR-302C	17	9.35169e-08	1.21572e-06	1.56562	105	246	0.0426656	23	207
MSigDB miRNA Motifs	Targets of MicroRNA TGCTTTG,MIR-330	18	2.0947e-07	2.57182e-06	1.52834	110	264	0.0446973	30	259
MSigDB miRNA Motifs	Targets of MicroRNA GTATTAT,MIR-369-3P	19	9.30087e-07	1.08184e-05	1.52577	99	238	0.0402276	18	160
MSigDB miRNA Motifs	Targets of MicroRNA AAGTCCA,MIR-422B,MIR-422A	20	2.41558e-06	2.66921e-05	2.04447	34	61	0.0138155	3	56
InterPro	Homeobox, conserved site	1	6.77809e-61	5.39468e-57	1.90423	461	888	0.187322	80	189
InterPro	Homeobox	2	5.79639e-56	2.30667e-52	1.79629	500	1021	0.203169	93	249
InterPro	Homeodomain-like	3	1.61237e-51	4.2776e-48	1.72361	523	1113	0.212515	98	330
InterPro	Homeodomain-related	4	1.16258e-50	2.31325e-47	1.72494	514	1093	0.208858	95	320
InterPro	Homeobox, eukaryotic	5	2.27359e-27	3.61911e-24	1.88567	219	426	0.0889882	39	90
InterPro	Transcription factor, T-box, conserved site	6	7.66374e-21	1.0166e-17	2.2675	102	165	0.0414466	8	17
InterPro	Transcription factor, T-box	6	7.66374e-21	1.0166e-17	2.2675	102	165	0.0414466	8	17
InterPro	Transcription factor, T-box, region of unknown function	8	1.05744e-20	1.05202e-17	3.11782	51	60	0.0207233	1	2
InterPro	Transcription factor COUP	9	1.92519e-20	1.70251e-17	2.88551	59	75	0.023974	3	5
InterPro	p53-like transcription factor, DNA-binding	10	6.15673e-20	4.90014e-17	2.18044	107	180	0.0434783	10	45
InterPro	Transcription factor SOX	11	1.70583e-18	1.23425e-15	2.76293	58	77	0.0235677	5	5
InterPro	Transcription factor AP-2	12	9.94143e-17	6.59365e-14	2.76431	52	69	0.0211296	4	5
InterPro	Transcription factor AP-2, C-terminal	12	9.94143e-17	6.59365e-14	2.76431	52	69	0.0211296	4	5
InterPro	Winged helix-turn-helix transcription repressor DNA-binding	14	4.82461e-16	2.74279e-13	1.7509	158	331	0.0642015	33	222
InterPro	Paired box protein, N-terminal	15	9.47306e-16	5.0264e-13	2.27357	75	121	0.0304754	6	9
InterPro	POU-specific	16	5.32893e-15	2.65081e-12	2.61284	52	73	0.0211296	5	18
InterPro	POU	16	5.32893e-15	2.65081e-12	2.61284	52	73	0.0211296	5	18
InterPro	High mobility group, HMG1/HMG2	18	2.48523e-13	1.09888e-10	2.18184	69	116	0.0280374	13	55
InterPro	Transcription factor, homeobox/POU	19	8.52024e-13	3.56908e-10	2.82743	37	48	0.0150345	3	4
InterPro	Helix-turn-helix motif, lambda-like repressor	20	6.97119e-12	2.77418e-09	1.88641	90	175	0.0365705	15	42
TreeFam	Zinc finger protein ZIC	1	4.80623e-35	3.83682e-31	3.51303	68	71	0.027631	5	5
TreeFam	T-box transcription factor	2	7.66374e-21	3.05898e-17	2.2675	102	165	0.0414466	8	17
TreeFam	receptor factor	3	1.92519e-20	5.12293e-17	2.88551	59	75	0.023974	3	8
TreeFam	Transcription factor AP-2	4	9.94143e-17	1.98406e-13	2.76431	52	69	0.0211296	4	5
TreeFam	POU domain, class transcription factor	5	5.32893e-15	8.50816e-12	2.61284	52	73	0.0211296	5	13
TreeFam	Homeobox protein	6	8.51288e-13	1.13264e-09	3.30122	27	30	0.0109712	3	4
TreeFam	Transcription factor	7	1.59239e-11	1.816e-08	2.3944	47	72	0.0190979	6	14
TreeFam	paired box 4 Paired protein Pax-6	8	1.4252e-10	1.42217e-07	2.82156	30	39	0.0121902	1	2
TreeFam	Protein CEI precursor	9	8.98765e-10	7.97205e-07	3.66802	16	16	0.00650142	1	1
TreeFam	Pituitary homeobox	10	5.45065e-08	4.35125e-05	2.5394	27	39	0.0109712	2	3
TreeFam	Paired box protein Pax-3 Pax-7	11	6.43592e-08	4.67072e-05	2.62001	25	35	0.0101585	2	2
TreeFam	protein LIM/homeobox	12	5.07514e-07	0.000337623	2.22958	31	51	0.0125965	7	13
TreeFam	Homeobox protein	13	1.14623e-06	0.000703876	2.07066	35	62	0.0142219	4	7
TreeFam	Iroquois-class homeodomain protein	14	1.32751e-06	0.000756967	2.13412	32	55	0.0130028	6	7
TreeFam	Transcription factor SOX-14 SOX-21	15	1.3418e-06	0.000714108	2.93442	16	20	0.00650142	2	2
TreeFam	Homeobox protein EMX1 EMX2	16	1.46719e-06	0.000732039	2.83438	17	22	0.00690776	2	2
TreeFam	Forkhead box protein	17	6.14869e-06	0.00288735	1.94189	36	68	0.0146282	9	25
TreeFam	1	18	8.96831e-06	0.00397745	2.28012	23	37	0.00934579	3	7
TreeFam	Cordon-bleu protein-like 1 Protein cordon-bleu	19	3.02654e-05	0.0127163	3.66802	8	8	0.00325071	1	1
TreeFam	Fez family zinc finger protein 2 1	20	3.10646e-05	0.0123994	2.62001	15	21	0.00609508	2	2
HGNC Gene Families	TBX	1	7.66374e-21	3.77056e-18	2.2675	102	165	0.0414466	8	16
HGNC Gene Families	NKL	2	4.07585e-18	1.00266e-15	1.85896	149	294	0.0605445	27	47
HGNC Gene Families	SOX	3	2.32116e-17	3.80671e-15	2.5364	65	94	0.026412	9	19
HGNC Gene Families	POU	4	5.32893e-15	6.55458e-13	2.61284	52	73	0.0211296	5	17
HGNC Gene Families	PAX, PRD	5	6.74783e-15	6.63987e-13	2.3095	68	108	0.027631	4	7
HGNC Gene Families	FOX	6	7.37103e-08	6.04425e-06	1.76897	68	141	0.027631	16	42
HGNC Gene Families	LIM	7	5.07514e-07	3.5671e-05	2.22958	31	51	0.0125965	7	13
HGNC Gene Families	PRD	8	6.35396e-07	3.90769e-05	1.70486	66	142	0.0268184	13	53
HGNC Gene Families	IRX, TALE	9	1.32751e-06	7.25708e-05	2.13412	32	55	0.0130028	6	6
HGNC Gene Families	HOXL	10	1.43646e-05	0.000706736	1.58948	65	150	0.026412	17	52
HGNC Gene Families	BHLH	11	2.2337e-05	0.000999071	1.4459	95	241	0.0386022	19	98
HGNC Gene Families	SP	12	2.49612e-05	0.00102341	2.49425	17	25	0.00690776	2	8
HGNC Gene Families	ADRA	13	0.000723737	0.0273907	2.62001	10	14	0.00406339	1	6
HGNC Gene Families	NF-E2	14	0.00111993	0.0393575	2.31664	12	19	0.00487607	2	3
